# Supplementary figures and images for: GLUT1‐mediated glucose uptake plays a crucial role during Plasmodium hepatic infection
Source: PubMed Central journal article supplement — Cell Microbiol. 2016 Aug 2;19(2):e12646. doi: 10.1111/cmi.12646 (PMC5297879; doi:10.1111/cmi.12646), 2016-08-02

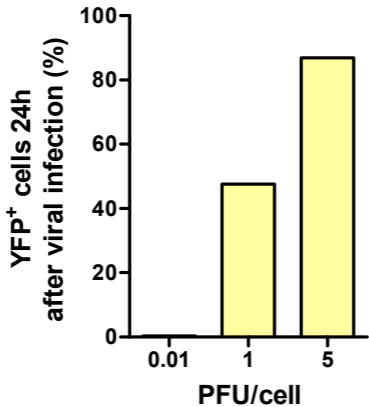

Supplement: CMI-19-0-s004.pdf [file CMI-19-0-s004.pdf]

**A**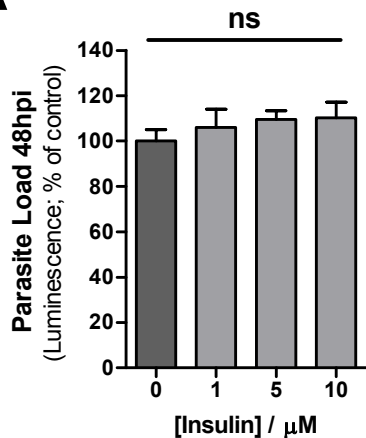**B**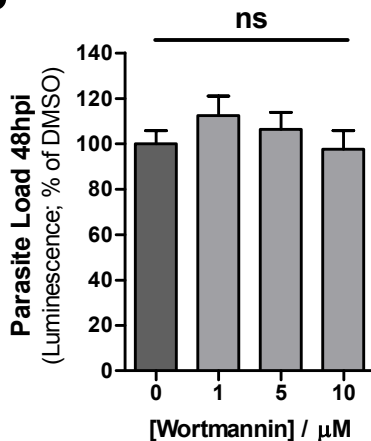**C**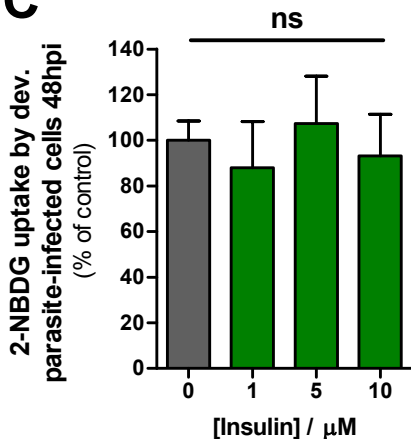**D**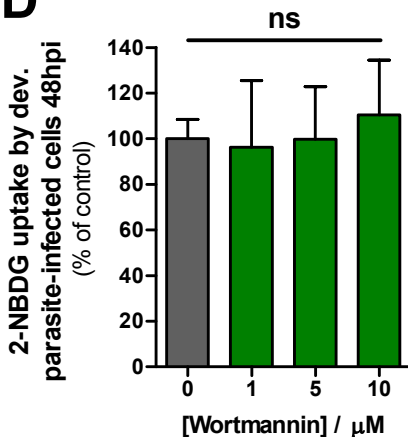

Supplement: CMI-19-0-s009.pdf [file CMI-19-0-s009.pdf]
